# Supplementary material for: To Be There or Not to Be There, That Is the Question—On the Problem of Delayed Sampling of Entomological Evidence
Source: MDPI journal article supplement (doi:10.3390/insects12020148), 2021-02-09
Supplement: s1 [file s1]

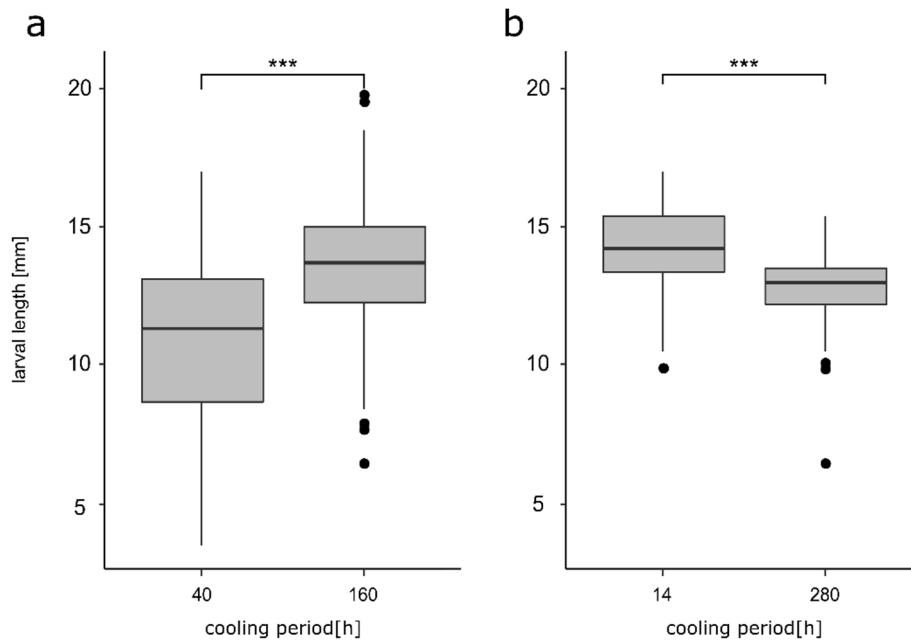

**Figure S1:** Larval length in mm for insect samples after different cooling periods. a) larvae of corpse 3 after 40 hours and 160 hours of cooling. b) larvae of corpse 4 after 14 and 280 hours of cooling. The asterisk indicates significant differences with  $p < 0.001$ .

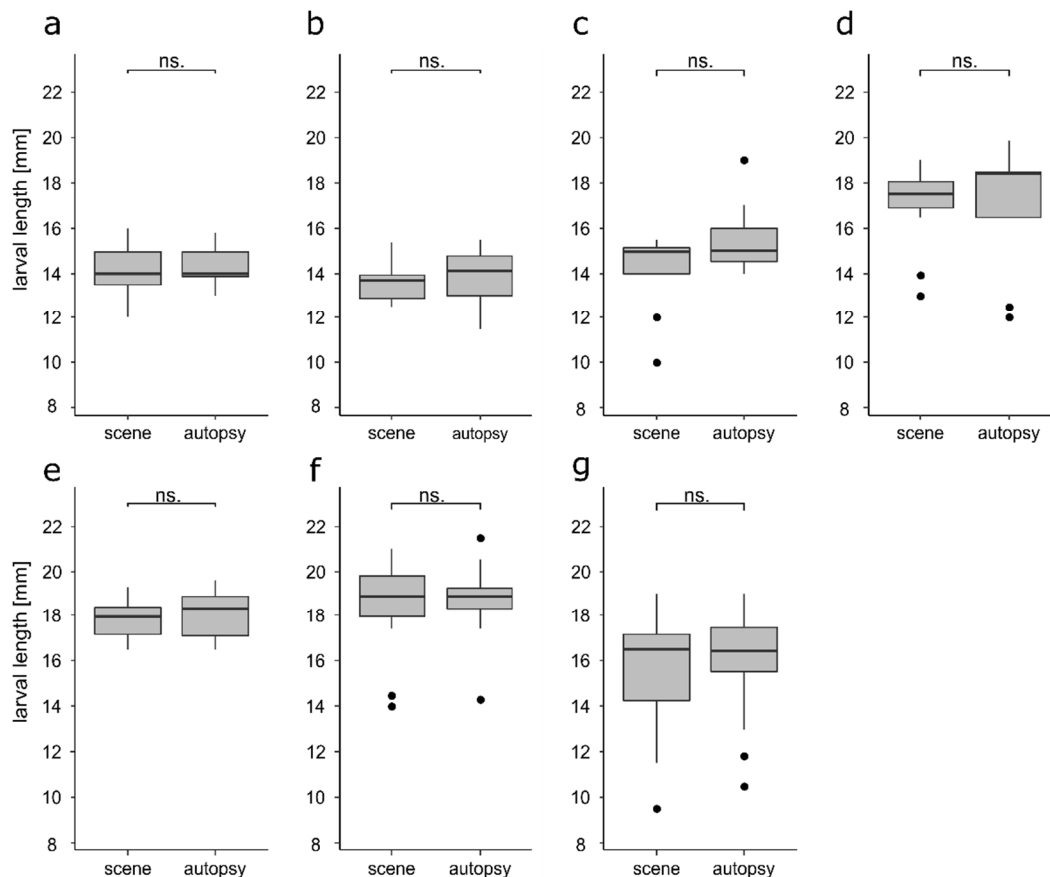

**Figure S2:** Larval length in mm for insect samples from the crime/death scene and the autopsy. a) larvae of *L. sericata* (both  $n = 16$ ) from case 16 after 0 and 6 days of cooling; b) larvae of *L. sericata* (both  $n = 20$ ) from case 18 after 0 and 7 days of cooling; c) larvae of *L. sericata* (both  $n = 16$ ) from case 19 after 0 and 6 days of cooling; d) larvae of *C. vicina* (both  $n = 20$ ) from case 8 after 0 and 10 days of cooling; e) larvae of *C. vicina* (both  $n = 10$ ) from case 14 after 0 and 6 days of cooling; f) larvae of *C. vicina* (both  $n = 36$ ) from case 28 after 0 and 7 days of cooling; g) larvae of *Ch. albiceps* (both  $n = 50$ ) from case 21 after 0 and 4 days of cooling

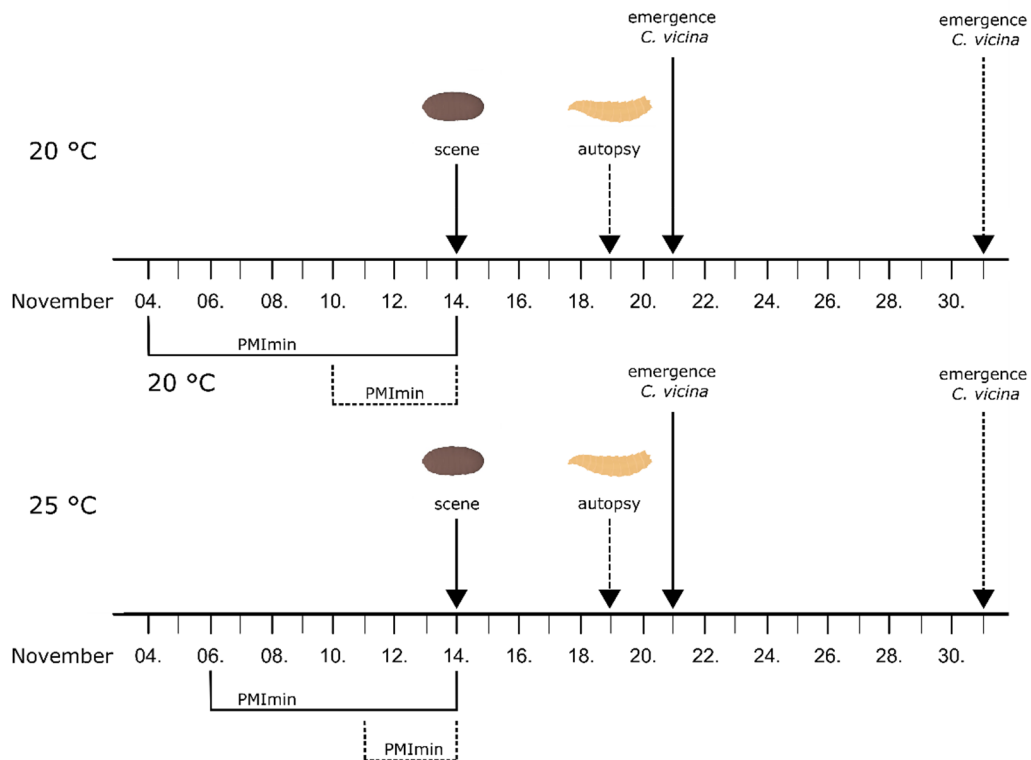

**Figure S3:** Comparison of scene-based and autopsy-based  $PMI_{min}$  estimations with temperature of 20 °C ad 25 °C. The time line shows the events (scene collection, autopsy collection) and the emergence of scene-collected and autopsy collected *C. vicina*. The solid line represent the scene-based  $PMI_{min}$  and the dashed line the autopsy-based  $PMI_{min}$ .

**Table S1:** Insect species found on the seven bodies. A checkmark indicates if the species was found on the body

| Species               | 2 | 3 | 4 | 5 | 6 | 7 | 8 |
|-----------------------|---|---|---|---|---|---|---|
| <i>C. vicina</i>      | ✓ | ✓ |   |   |   |   |   |
| <i>C. vomitoria</i>   |   | ✓ |   |   |   |   |   |
| <i>Ch. albiceps</i>   |   |   | ✓ |   |   |   |   |
| <i>L. ampullacea</i>  | ✓ |   |   |   |   |   |   |
| <i>L. sericata</i>    | ✓ | ✓ | ✓ | ✓ | ✓ | ✓ | ✓ |
| <i>P. regina</i>      |   | ✓ | ✓ | ✓ |   |   | ✓ |
| <i>P. terraenovae</i> |   | ✓ |   | ✓ |   |   |   |
| <i>S. argyrostoma</i> |   | ✓ | ✓ |   |   |   |   |
